# Supplementary material for: Decreased Serum Stromal Cell-Derived Factor-1 in Patients with Familial Hypercholesterolemia and Its Strong Correlation with Lipoprotein Subfractions
Source: MDPI journal article supplement (doi:10.3390/ijms242015308), 2023-10-18
Supplement: s1 [file s1]

**Supplementary Table S1.** Results of univariate analysis between clinical variables and serum stromal derived factor-1 (SDF-1) in patients with heterozygous familial hypercholesterolemic (HeFH) and controls.

|                                      | HeFH        |              | Controls     |              |
|--------------------------------------|-------------|--------------|--------------|--------------|
|                                      | r           | p-value      | r            | p-value      |
| Age (yrs)                            | 0.11        | 0.374        | -0.02        | 0.930        |
| Gender (m/f)                         | 0.22        | 0.068        | 0.30         | 0.143        |
| Body mass index (kg/m <sup>2</sup> ) | -0.10       | 0.488        | -0.18        | 0.379        |
| Fasting glucose (mmol/L)             | -0.05       | 0.691        | 0.06         | 0.733        |
| Cholesterol (mmol/L)                 | 0.03        | 0.783        | -0.21        | 0.255        |
| Ig Triglyceride (mmol/L)             | -0.22       | 0.069        | <b>-0.36</b> | <b>0.044</b> |
| LDL-C (mmol/L)                       | 0.08        | 0.535        | -0.30        | 0.102        |
| ApoB100 (g/L)                        | -0.16       | 0.188        | -0.37        | 0.074        |
| VLDL (mmol/L)                        | -0.17       | 0.189        | <b>-0.44</b> | <b>0.014</b> |
| IDL (mmol/L)                         | 0.11        | 0.383        | 0.01         | 0.967        |
| Large LDL (mmol/L)                   | 0.19        | 0.131        | -0.35        | 0.057        |
| Mean LDL size (mmol/L)               | <b>0.26</b> | <b>0.041</b> | 0.33         | 0.069        |
| HDL-C (mmol/L)                       | 0.12        | 0.320        | 0.18         | 0.339        |
| ApoA1                                | 0.06        | 0.626        | 0.04         | 0.871        |
| Large HDL (mmol/L)                   | <b>0.27</b> | <b>0.032</b> | 0.19         | 0.297        |
| Intermediate HDL (mmol/L)            | 0.23        | 0.067        | 0.23         | 0.216        |
| Small HDL (mmol/L)                   | -0.14       | 0.278        | -0.17        | 0.375        |
| Oxidized LDL (U/L)                   | -0.02       | 0.856        | -0.29        | 0.113        |
| Ig MPO                               | -0.10       | 0.395        | 0.01         | 0.960        |

Significant correlations (p<0.05) are marked in bold print. Abbreviations: ApoA1: apolipoprotein A1; ApoB100: apolipoprotein B100; HDL-C: high-density lipoprotein cholesterol; IDL; intermediate-density lipoprotein; LDL-C: low-density lipoprotein cholesterol; MPO: myeloperoxidase; oxLDL: oxidized LDL; VLDL; very-low density lipoprotein.

Notes: The relationship between variables and SDF-1 was analyzed with Pearson's univariate test.
